# Supplementary material for: Damaging BTK Variant Demonstrated by Carrier, Allele-Specific BTK Expression in B Cells and Monocytes
Source: Springer Nature journal article supplement (doi:10.1007/s10875-019-0591-6), 2019-01-01
Supplement: MOESM1 [file 16390124]

**Supplementary Data**

**Methods:**

DNA was isolated from PBMC using PreAnalytix Paxgene whole blood DNA kit (PreAnalytix Paxgene, Switzerland) and total RNA was isolated from cells fractions using TRIzol (ThermoFisher Scientific). Nucleic acid was quantified by fluorescence on the Qubit (ThermoFisher Scientific). Library preparation and targeted sequencing was performed using the MiSeqDX System (Illumina, San Francisco, CA). DNA libraries were made using the TruSight Rapid Capture Library Prep kit with TruSight One oligonucleotide panel (Illumina, San Francisco, CA) per manufacturer’s instructions. For cDNA sequencing of the BTK cDNAs, monocyte and B cell fractions were obtained from PBMC stained with CD14-FITC and CD-19 APC (BD Biosciences, San Jose, CA) at 1:10 for 107 cells then sorted on a FACSAia II flow cytometer (BD Biosciences, San Jose, CA). PCR amplification of BTK using oligos shown in Fig 1A (Integrated DNA Technologies, Coralville, IA.) was performed and RNA libraries were made using the TruSeq Amplicon Library Prep kit (Illumina, San Francisco, CA).

**Supplementary Figure 1.** A. Position of the variant in BTK (c. 1004T>A) (top) and with p.V335D mutation in the protein (bottom). Primers for RT-PCR cDNA amplification are highlighted in yellow, with the nucleotide substitution indicated in red. PH, pleckstrin homology; TH, TEC homology domain; SH, src homology. B. Outline of the FACS and RNA sequencing of B cells and monocytes in carrier.

**Supplementary Figure 2**. Flow cytometry histograms measuring BTK expression in the proband and the sister. Expression was measured in CD14+ monocytes and CD19+ B cells. The isotype controls for each subject sample is presented across the top row, whereas the subject results are shown across the bottom row. Quantification of the expression is included in Table 1.
